# Supplementary material for: Skatole (3-Methylindole) Is a Partial Aryl Hydrocarbon Receptor Agonist and Induces CYP1A1/2 and CYP1B1 Expression in Primary Human Hepatocytes
Source: PubMed Central journal article supplement (PMC4854444; doi:10.1371/journal.pone.0154629), 2016-05-03

## S1 figure. HepG2-C3 cell viability after Actinomycin D treatment

HepG2-C3 cells (n = 3) were treated with 4  $\mu$ M actinomycin D (ACT) for 9 hours.

Following treatment cell viability was assessed using the CellTiterGlo assay

(Promega).

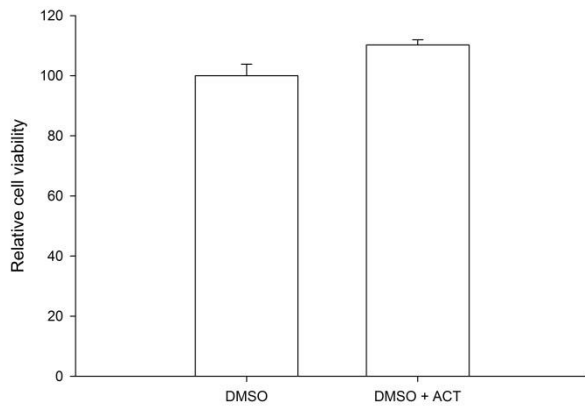

Supplement: pone.0154629.s001.pdf [file pone.0154629.s001.pdf]
