# Supplementary material for: Skatole (3-Methylindole) Is a Partial Aryl Hydrocarbon Receptor Agonist and Induces CYP1A1/2 and CYP1B1 Expression in Primary Human Hepatocytes
Source: PubMed Central journal article supplement (PMC4854444; doi:10.1371/journal.pone.0154629), 2016-05-03

## S2 figure. Housekeeping genes mRNA expression in HepG2-C3.

RT-qPCR analysis of (A)  $\beta$ -actin and (B) *RPLP0* mRNA expression in HepG2-C3 cells following incubation with 4  $\mu$ M actinomycin D (ACT) for 1 h and incubation with 10 nM TCDD or 10, 50 or 100  $\mu$ M skatole for 8 h (n = 3).

A

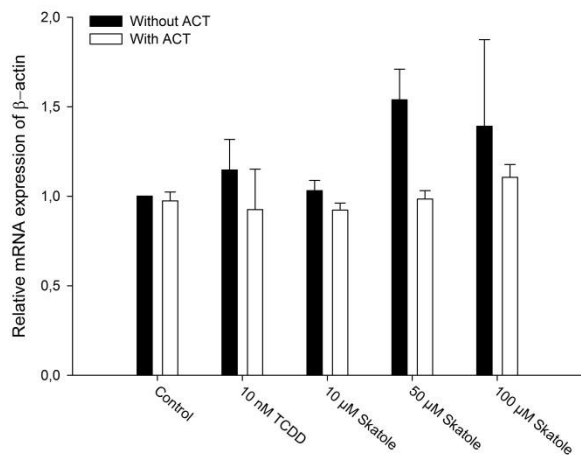

B

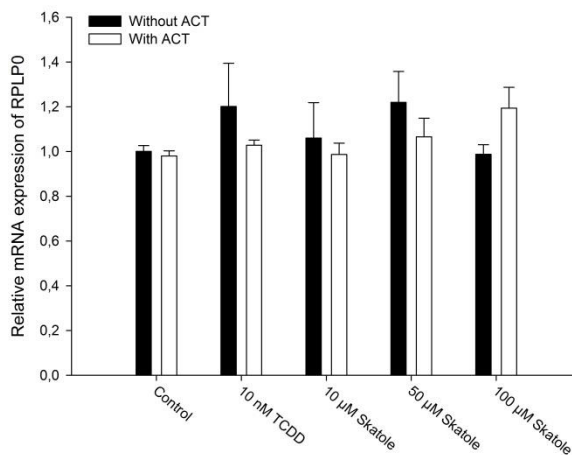

Supplement: pone.0154629.s002.pdf [file pone.0154629.s002.pdf]
