# Supplementary material for: Skatole (3-Methylindole) Is a Partial Aryl Hydrocarbon Receptor Agonist and Induces CYP1A1/2 and CYP1B1 Expression in Primary Human Hepatocytes
Source: PubMed Central journal article supplement (PMC4854444; doi:10.1371/journal.pone.0154629), 2016-05-03

### S3 figure. CYP1A2 mRNA expression in HepG2-C3.

RT-qPCR analysis of CYP1A2 mRNA expression in HepG2-C3 cells following incubation with 4  $\mu\text{M}$  actinomycin D (ACT) for 1 h and incubation with 10 nM TCDD or 10, 50 or 100  $\mu\text{M}$  skatole for 8 h (n = 3).

ND, not detected.

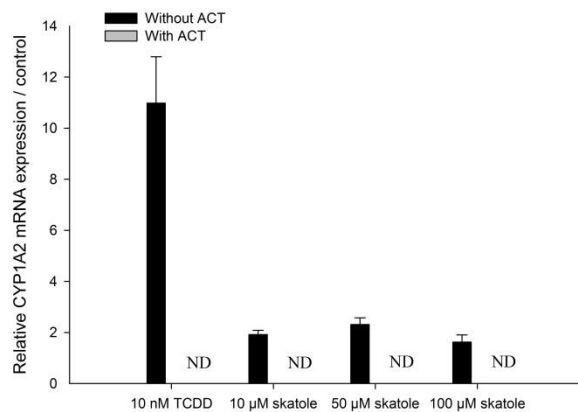

Supplement: pone.0154629.s003.pdf [file pone.0154629.s003.pdf]
